# Supplementary material
Source: MDPI journal article supplement (https://www.mdpi.com/2073-431X/8/2/30)
Supplement: s1 [file s1]

## Sheet: Sheet1
Downsampling / Upsampling / Parameters	MSE	PSNR	MSSIM
Hamming / Welch / {3,11}	18.837	22.6306	0.85921
Hamming / PoC window / {3,11,1}	18.8345	22.6317	0.85921
Hanning / PoC window / {3,11,1}	18.8918	22.6053	0.85906
Hanning / Welch / {3,11}	18.8952	22.6038	0.85905
Hamming / Hanning / {3,11}	18.8369	22.6306	0.85897
Hamming / Welch / {3,7}	18.8372	22.6305	0.85896
Hanning / Welch / {3,7}	18.8884	22.6069	0.8589
Hanning / Hanning / {3,11}	18.8897	22.6063	0.85889
Hamming / PoC window / {3,7,1}	18.8455	22.6267	0.85876
Hanning / PoC window / {3,7,1}	18.8954	22.6037	0.85872
Hamming / Hamming / {3,11}	18.8511	22.6241	0.85852
Hamming / PoC window / {3,11,3}	18.8567	22.6215	0.85847
Hanning / PoC window / {3,11,3}	18.9058	22.5989	0.85845
Hanning / Hamming / {3,11}	18.9011	22.601	0.85845
Hamming / Blackman / {3,11}	18.8627	22.6187	0.85833
Hanning / Blackman / {3,11}	18.9113	22.5964	0.85832
Hanning / Kaiser / {3,11}	18.9191	22.5928	0.85813
Hamming / Kaiser / {3,11}	18.8715	22.6147	0.85813
Hanning / Welch / {3,5}	18.9461	22.5804	0.85772
Hanning / Dolph-Chebyshev / {3,11}	18.9378	22.5842	0.85772
Hamming / Dolph-Chebyshev / {3,11}	18.8921	22.6052	0.85769
Hanning / B-spline window / {3,11}	18.9374	22.5844	0.85767
Hamming / Welch / {3,5}	18.9032	22.6001	0.85764
Hamming / B-spline window / {3,11}	18.8918	22.6053	0.85764
Hanning / Nutall / {3,11}	18.9426	22.582	0.85762
Hamming / Nutall / {3,11}	18.8973	22.6028	0.85758
Hanning / Blackman-Harris / {3,11}	18.9458	22.5805	0.85747
Hamming / Blackman-Harris / {3,11}	18.9015	22.6009	0.85743
Hanning / Hanning / {3,7}	18.9589	22.5745	0.85736
Hamming / Hanning / {3,7}	18.9153	22.5945	0.85729
Hanning / PoC window / {3,5,1}	18.969	22.5699	0.85726
Hamming / PoC window / {3,5,1}	18.9271	22.5891	0.85716
Hanning / Hamming / {3,7}	18.9643	22.5721	0.85687
Hamming / Hamming / {3,7}	18.9248	22.5902	0.85678
Hanning / B-spline / {3,7,7}	26.4285	19.6894	0.85635
Hamming / B-spline / {3,7,7}	26.3437	19.7173	0.85629
Hamming / B-spline / {3,9,9}	44.047	15.2525	0.85619
Hanning / B-spline / {3,9,9}	44.2053	15.2213	0.85618
Hanning / PoC window / {3,7,3}	19.0414	22.5368	0.85564
Hamming / PoC window / {3,7,3}	19.0028	22.5545	0.85549
Hanning / Blackman / {3,7}	19.0581	22.5292	0.85528
Hamming / Blackman / {3,7}	19.0195	22.5468	0.85513
Hanning / Kaiser / {3,7}	19.0864	22.5163	0.85469
Hamming / Kaiser / {3,7}	19.0491	22.5333	0.85452
Hanning / Hanning / {3,5}	19.1315	22.4958	0.85407
Hanning / Flat top / {3,11}	19.1229	22.4997	0.85405
Hamming / Hanning / {3,5}	19.0953	22.5123	0.85386
Hamming / Flat top / {3,11}	19.0879	22.5156	0.85384
Hanning / B-spline / {3,5,5}	20.7727	21.781	0.8538
Hanning / Hamming / {3,5}	19.122	22.5001	0.85364
Hamming / B-spline / {3,5,5}	20.7217	21.8023	0.85363
Hanning / B-spline window / {3,7}	19.1391	22.4924	0.8535
Hanning / Dolph-Chebyshev / {3,7}	19.1485	22.4881	0.85343
Hamming / Hamming / {3,5}	19.0918	22.5139	0.85341
Hamming / B-spline window / {3,7}	19.1052	22.5078	0.85328
Hamming / Dolph-Chebyshev / {3,7}	19.1133	22.5041	0.85322
Hanning / Nutall / {3,7}	19.1634	22.4814	0.85314
Hamming / B-spline / {3,11,11}	93.1463	8.74749	0.85303
Hanning / B-spline / {3,11,11}	93.4851	8.71595	0.85298
Hanning / Blackman-Harris / {3,7}	19.1656	22.4804	0.85294
Hamming / Nutall / {3,7}	19.1286	22.4971	0.85291
Hamming / Blackman-Harris / {3,7}	19.1323	22.4955	0.85271
Hanning / Welch / {3,3}	19.2999	22.4197	0.85163
German / Welch / {1,11}	19.1881	22.4702	0.85152
German / PoC window / {1,11,1}	19.1854	22.4714	0.85152
Hamming / Welch / {3,3}	19.2639	22.4359	0.85137
German / Welch / {1,7}	19.1836	22.4722	0.85135
German / Hanning / {1,11}	19.186	22.4711	0.85133
German / PoC window / {1,7,1}	19.1911	22.4688	0.85117
German / PoC window / {1,11,3}	19.2039	22.463	0.85086
German / Hamming / {1,11}	19.2044	22.4628	0.8508
German / Blackman / {1,11}	19.2098	22.4603	0.85072
German / Kaiser / {1,11}	19.218	22.4566	0.85053
Hanning / PoC window / {3,3,1}	19.3578	22.3937	0.85045
Hanning / PoC window / {3,5,3}	19.3072	22.4164	0.85039
German / Welch / {1,5}	19.2384	22.4474	0.8502
Hamming / PoC window / {3,3,1}	19.3202	22.4106	0.85019
German / Dolph-Chebyshev / {1,11}	19.2375	22.4478	0.8501
Hamming / PoC window / {3,5,3}	19.2767	22.4302	0.85008
German / B-spline window / {1,11}	19.2388	22.4473	0.85003
German / Nutall / {1,11}	19.2424	22.4456	0.85
German / Blackman-Harris / {1,11}	19.2481	22.443	0.84982
German / Hanning / {1,7}	19.2559	22.4395	0.84977
Hanning / Blackman / {3,5}	19.3346	22.4041	0.84976
German / PoC window / {1,5,1}	19.2617	22.4369	0.84972
Hamming / Blackman / {3,5}	19.3041	22.4178	0.84945
German / Hamming / {1,7}	19.273	22.4318	0.84914
Hanning / Kaiser / {3,5}	19.391	22.3788	0.84857
Blackman / PoC window / {3,11,1}	19.3206	22.4104	0.84829
Blackman / Welch / {3,11}	19.3244	22.4087	0.84827
Hanning / Appledorn / {3,5,7}	19.4111	22.3698	0.84826
Hanning / Appledorn / {3,5,11}	19.4111	22.3698	0.84826
Hanning / Appledorn / {3,5,5}	19.4115	22.3696	0.84824
Hamming / Kaiser / {3,5}	19.3624	22.3916	0.84823
Blackman / Welch / {3,7}	19.3114	22.4145	0.84823
Blackman / Hanning / {3,11}	19.3155	22.4127	0.84818
Blackman / PoC window / {3,7,1}	19.317	22.412	0.84807
German / PoC window / {1,7,3}	19.3413	22.4011	0.84799
Hamming / Appledorn / {3,5,11}	19.3828	22.3825	0.84791
Hamming / Appledorn / {3,5,7}	19.3828	22.3825	0.84791
Hamming / Appledorn / {3,5,5}	19.3833	22.3822	0.8479
Blackman / PoC window / {3,11,3}	19.3293	22.4065	0.84777
Blackman / Blackman / {3,11}	19.3344	22.4042	0.84764
German / Blackman / {1,7}	19.3591	22.3931	0.84761
Blackman / Hamming / {3,11}	19.3377	22.4027	0.8476
Blackman / Kaiser / {3,11}	19.3415	22.401	0.84747
Blackman / Welch / {3,5}	19.3553	22.3948	0.84723
Blackman / Dolph-Chebyshev / {3,11}	19.3586	22.3933	0.84707
German / Kaiser / {1,7}	19.3885	22.3799	0.847
Blackman / B-spline window / {3,11}	19.361	22.3923	0.84699
Blackman / Nutall / {3,11}	19.363	22.3914	0.84697
Hanning / B-spline window / {3,5}	19.474	22.3417	0.84694
Blackman / Hanning / {3,7}	19.3732	22.3868	0.8468
Blackman / PoC window / {3,5,1}	19.3763	22.3854	0.84678
Blackman / Blackman-Harris / {3,11}	19.3698	22.3883	0.84678
Hamming / B-spline window / {3,5}	19.4467	22.3539	0.84656
German / Hanning / {1,5}	19.4261	22.3631	0.84646
German / Flat top / {1,11}	19.4225	22.3647	0.84638
Blackman / Hamming / {3,7}	19.3963	22.3764	0.84608
Hanning / Dolph-Chebyshev / {3,5}	19.5104	22.3255	0.84606
German / Hamming / {1,5}	19.4337	22.3597	0.84583
German / B-spline window / {1,7}	19.4456	22.3544	0.84573
German / Dolph-Chebyshev / {1,7}	19.4524	22.3513	0.8457
Blackman / B-spline / {3,7,7}	26.302	19.731	0.84569
Hamming / Dolph-Chebyshev / {3,5}	19.4853	22.3367	0.84566
Blackman / B-spline / {3,9,9}	43.1822	15.4247	0.84553
Hanning / Nutall / {3,5}	19.5388	22.3129	0.84547
German / Nutall / {1,7}	19.4676	22.3446	0.84539
Hanning / Blackman-Harris / {3,5}	19.5382	22.3131	0.84525
German / Blackman-Harris / {1,7}	19.474	22.3417	0.84514
Blackman / PoC window / {3,7,3}	19.4535	22.3508	0.84508
Hamming / Nutall / {3,5}	19.5144	22.3237	0.84506
Hamming / Blackman-Harris / {3,5}	19.5158	22.3231	0.84483
Blackman / Blackman / {3,7}	19.4709	22.3431	0.8447
German / Welch / {1,3}	19.5717	22.2982	0.84425
Hanning / B-spline / {3,3,3}	19.7723	22.2096	0.8442
Blackman / Kaiser / {3,7}	19.4992	22.3304	0.84411
Hamming / B-spline / {3,3,3}	19.7452	22.2216	0.8438
Blackman / Hanning / {3,5}	19.531	22.3163	0.84364
Blackman / Flat top / {3,11}	19.5304	22.3166	0.84352
Hanning / Flat top / {3,7}	19.6579	22.2601	0.84342
Blackman / B-spline / {3,5,5}	21.0412	21.6694	0.84308
German / PoC window / {1,3,1}	19.6327	22.2712	0.84301
Hamming / Flat top / {3,7}	19.636	22.2697	0.84294
Blackman / Hamming / {3,5}	19.5471	22.3091	0.84291
Blackman / B-spline window / {3,7}	19.5558	22.3053	0.84285
Blackman / Dolph-Chebyshev / {3,7}	19.5611	22.3029	0.84283
Hanning / Appledorn / {3,3,7}	19.6817	22.2496	0.84281
Hanning / Appledorn / {3,3,11}	19.6817	22.2496	0.84281
Hanning / Appledorn / {3,3,5}	19.6816	22.2496	0.84281
German / PoC window / {1,5,3}	19.6108	22.2809	0.8426
Blackman / Nutall / {3,7}	19.5759	22.2964	0.84252
Blackman / B-spline / {3,11,11}	90.4789	8.99985	0.8424
Hamming / Appledorn / {3,3,7}	19.6593	22.2594	0.84235
Hamming / Appledorn / {3,3,11}	19.6593	22.2594	0.84235
Hamming / Appledorn / {3,3,5}	19.6593	22.2595	0.84235
Blackman / Blackman-Harris / {3,7}	19.5841	22.2927	0.84226
German / Blackman / {1,5}	19.6414	22.2674	0.84192
Hanning / Hamming / {3,3}	19.7126	22.2359	0.84185
Hanning / Hanning / {3,3}	19.7786	22.2069	0.8418
Blackman / Welch / {3,3}	19.6584	22.2599	0.84166
Hamming / Hanning / {3,3}	19.7456	22.2214	0.84139
Gaussian window / PoC window / {1,5,1}	19.8217	22.188	0.84137
Hamming / Hamming / {3,3}	19.6951	22.2436	0.84134
Gaussian window / Welch / {1,5}	19.8373	22.1812	0.84129
Gaussian window / Hanning / {1,7}	19.8315	22.1837	0.84119
Gaussian window / Nutall / {1,11}	19.8519	22.1747	0.84092
Gaussian window / PoC window / {1,7,3}	19.818	22.1896	0.84084
Gaussian window / Kaiser / {1,11}	19.8755	22.1645	0.84077
Gaussian window / B-spline window / {1,11}	19.8614	22.1706	0.84077
Gaussian window / Blackman / {1,7}	19.8184	22.1894	0.84071
Gaussian window / Blackman-Harris / {1,11}	19.861	22.1708	0.8407
Gaussian window / Blackman / {1,11}	19.8863	22.1597	0.84068
German / Kaiser / {1,5}	19.7008	22.2411	0.84066
Gaussian window / Hanning / {1,5}	19.8114	22.1925	0.84063
Gaussian window / PoC window / {1,7,1}	19.9026	22.1526	0.84062
Gaussian window / PoC window / {1,11,3}	19.8943	22.1562	0.84062
Gaussian window / Kaiser / {1,7}	19.8218	22.188	0.84048
Blackman / PoC window / {3,3,1}	19.7198	22.2327	0.8404
German / Appledorn / {1,5,11}	19.7178	22.2336	0.84039
German / Appledorn / {1,5,7}	19.7178	22.2336	0.84039
Gaussian window / Welch / {1,7}	19.9246	22.143	0.84038
German / Appledorn / {1,5,5}	19.7184	22.2334	0.84037
Gaussian window / Flat top / {1,11}	19.8244	22.1868	0.84032
Gaussian window / Welch / {1,3}	19.8273	22.1855	0.84026
Gaussian window / B-spline / {1,7,7}	28.8762	18.92	0.84018
Gaussian window / Hamming / {1,7}	19.8785	22.1632	0.84015
Gaussian window / Hanning / {1,11}	19.9449	22.1342	0.8401
Gaussian window / B-spline window / {1,7}	19.8375	22.1811	0.83983
Blackman / PoC window / {3,5,3}	19.7138	22.2354	0.8398
Gaussian window / Nutall / {1,7}	19.8378	22.1809	0.83979
Gaussian window / B-spline / {1,5,5}	21.9681	21.295	0.83965
Gaussian window / PoC window / {1,3,1}	19.8466	22.1771	0.83961
Gaussian window / Blackman-Harris / {1,7}	19.8508	22.1752	0.83946
Gaussian window / Hamming / {1,5}	19.863	22.1699	0.83941
Gaussian window / Hamming / {1,11}	19.9811	22.1184	0.83932
Blackman / Blackman / {3,5}	19.7454	22.2215	0.8391
Gaussian window / PoC window / {1,11,1}	20.0331	22.0958	0.83901
German / B-spline window / {1,5}	19.7845	22.2043	0.83899
Gaussian window / Welch / {1,11}	20.0549	22.0864	0.83873
Gaussian window / B-spline / {1,9,9}	50.0793	14.1376	0.83847
Gaussian window / PoC window / {1,5,3}	19.8846	22.1605	0.83842
German / Dolph-Chebyshev / {1,5}	19.8259	22.1861	0.83804
Gaussian window / Blackman / {1,5}	19.9008	22.1534	0.83795
Blackman / Kaiser / {3,5}	19.805	22.1953	0.83784
Blackman / Appledorn / {3,5,11}	19.8206	22.1885	0.83758
Blackman / Appledorn / {3,5,7}	19.8206	22.1885	0.83758
Blackman / Appledorn / {3,5,5}	19.8213	22.1882	0.83756
German / Nutall / {1,5}	19.8555	22.1732	0.83743
German / Blackman-Harris / {1,5}	19.861	22.1708	0.83713
Gaussian window / Kaiser / {1,5}	19.9336	22.1391	0.8371
Blackman / B-spline window / {3,5}	19.8874	22.1592	0.83618
Gaussian window / B-spline window / {1,5}	19.972	22.1224	0.83612
German / Flat top / {1,7}	19.967	22.1245	0.83544
Blackman / Dolph-Chebyshev / {3,5}	19.9307	22.1404	0.83521
Gaussian window / Nutall / {1,5}	20.0274	22.0983	0.83481
German / Appledorn / {1,3,7}	19.9947	22.1125	0.83476
German / Appledorn / {1,3,11}	19.9947	22.1125	0.83476
German / Appledorn / {1,3,5}	19.9946	22.1125	0.83476
Blackman / Nutall / {3,5}	19.9604	22.1274	0.83458
Gaussian window / Blackman-Harris / {1,5}	20.044	22.0911	0.83437
Blackman / Blackman-Harris / {3,5}	19.9687	22.1238	0.83425
Gaussian window / B-spline / {1,11,11}	113.567	7.02576	0.83399
German / Hanning / {1,3}	20.0744	22.078	0.83391
German / Hamming / {1,3}	20.0356	22.0948	0.83367
Gaussian window / Flat top / {1,7}	20.0849	22.0734	0.83363
Hanning / German / {3,1}	20.1338	22.0523	0.83307
Hanning / German / {3,1}	20.1338	22.0523	0.83307
Gaussian window / Hanning / {1,3}	20.1226	22.0571	0.83305
Blackman / B-spline / {3,3,3}	20.1892	22.0284	0.83295
Gaussian window / B-spline / {1,3,3}	20.4158	21.9315	0.83272
Blackman / Flat top / {3,7}	20.0663	22.0815	0.83266
Hamming / German / {3,1}	20.1246	22.0562	0.8324
Hamming / German / {3,1}	20.1246	22.0562	0.8324
Blackman / Appledorn / {3,3,7}	20.0964	22.0684	0.83194
Blackman / Appledorn / {3,3,11}	20.0964	22.0684	0.83194
Blackman / Appledorn / {3,3,5}	20.0963	22.0685	0.83194
Gaussian window / Hamming / {1,3}	20.1558	22.0428	0.83189
Blackman / Hanning / {3,3}	20.1675	22.0378	0.8312
Blackman / Hamming / {3,3}	20.141	22.0492	0.83081
Hanning / PoC window / {3,3,3}	20.2449	22.0045	0.83076
Hamming / PoC window / {3,3,3}	20.2415	22.0059	0.83
Hanning / Blackman / {3,3}	20.3002	21.9808	0.82932
Hamming / Blackman / {3,3}	20.3027	21.9797	0.8285
Hanning / Flat top / {3,5}	20.4756	21.9061	0.82617
Hanning / Kaiser / {3,3}	20.445	21.9191	0.82607
Hamming / Flat top / {3,5}	20.4787	21.9048	0.8253
Hamming / Kaiser / {3,3}	20.4551	21.9148	0.82516
Gaussian window / German / {1,1}	20.5018	21.895	0.82415
Gaussian window / PoC window / {1,3,3}	20.5896	21.8579	0.82237
German / PoC window / {1,3,3}	20.5855	21.8596	0.82214
Blackman / German / {3,1}	20.5811	21.8614	0.82156
Blackman / German / {3,1}	20.5811	21.8614	0.82156
Hanning / B-spline window / {3,3}	20.6714	21.8234	0.82117
Gaussian window / Blackman / {1,3}	20.6533	21.831	0.82088
German / Blackman / {1,3}	20.6484	21.8331	0.82058
Hamming / B-spline window / {3,3}	20.6917	21.8149	0.82012
Hanning / Dolph-Chebyshev / {3,3}	20.7348	21.7968	0.8198
Blackman / PoC window / {3,3,3}	20.6965	21.8129	0.81916
Hamming / Dolph-Chebyshev / {3,3}	20.758	21.7871	0.81872
Gaussian window / Flat top / {1,5}	20.7711	21.7816	0.81857
Hanning / Nutall / {3,3}	20.8016	21.7689	0.81839
Hanning / Blackman-Harris / {3,3}	20.7933	21.7724	0.81823
Gaussian window / Kaiser / {1,3}	20.7963	21.7711	0.81776
Blackman / Blackman / {3,3}	20.7626	21.7852	0.81756
German / Flat top / {1,5}	20.8137	21.7638	0.81751
Hamming / Nutall / {3,3}	20.8274	21.7581	0.81727
German / Kaiser / {1,3}	20.8016	21.7689	0.81717
Hamming / Blackman-Harris / {3,3}	20.8234	21.7598	0.81708
German / B-spline / {1,7,7}	19.3785	22.9631	0.81622
German / B-spline / {1,7,7}	19.3785	22.9631	0.81622
German / B-spline / {1,9,9}	30.2671	19.373	0.81614
German / B-spline / {1,9,9}	30.2671	19.373	0.81614
Blackman / Flat top / {3,5}	20.9224	21.7186	0.81455
Blackman / Kaiser / {3,3}	20.9189	21.72	0.8141
German / B-spline / {1,5,5}	16.2625	24.2825	0.81403
German / B-spline / {1,5,5}	16.2625	24.2825	0.81403
Hanning / Dodgson / {3,1}	21.0526	21.6647	0.81352
German / B-spline / {1,11,11}	66.5817	12.2436	0.81341
German / B-spline / {1,11,11}	66.5817	12.2436	0.81341
Hanning / HPL-2007 / {3,3,0.6,0.5}	21.0144	21.6805	0.81324
Hanning / HPL-2007 / {3,7,0.6,0.5}	21.0143	21.6805	0.81324
Hanning / HPL-2007 / {3,11,0.6,0.5}	21.0143	21.6805	0.81324
Gaussian window / B-spline window / {1,3}	21.0128	21.6811	0.81314
Hamming / Dodgson / {3,1}	21.0961	21.6468	0.81217
German / B-spline window / {1,3}	21.0364	21.6714	0.81208
Hamming / HPL-2007 / {3,7,0.6,0.5}	21.0489	21.6662	0.81201
Hamming / HPL-2007 / {3,11,0.6,0.5}	21.0489	21.6662	0.81201
Hamming / HPL-2007 / {3,3,0.6,0.5}	21.0489	21.6662	0.812
Gaussian window / Dolph-Chebyshev / {1,3}	21.0744	21.6557	0.81183
German / Dolph-Chebyshev / {1,3}	21.1021	21.6443	0.81066
Gaussian window / Nutall / {1,3}	21.1376	21.6297	0.8105
Gaussian window / Blackman-Harris / {1,3}	21.1566	21.6219	0.80998
German / Nutall / {1,3}	21.1705	21.6162	0.8092
Blackman / B-spline window / {3,3}	21.1569	21.6218	0.80894
German / Blackman-Harris / {1,3}	21.1706	21.6161	0.80893
Blackman / Dolph-Chebyshev / {3,3}	21.2234	21.5945	0.8075
Blackman / Nutall / {3,3}	21.2923	21.5663	0.80603
Blackman / Blackman-Harris / {3,3}	21.2962	21.5648	0.80571
German / B-spline / {1,3,3}	15.815	24.4772	0.80544
German / B-spline / {1,3,3}	15.815	24.4772	0.80544
German / German / {1,1}	17.5545	23.5224	0.80539
German / German / {1,1}	17.5545	23.5224	0.80539
German / German / {1,1}	17.5545	23.5224	0.80539
German / Dodgson / {1,1}	21.4195	21.5146	0.80431
German / HPL-2007 / {1,3,0.6,0.5}	21.4	21.5225	0.80373
German / HPL-2007 / {1,7,0.6,0.5}	21.3999	21.5226	0.80373
German / HPL-2007 / {1,11,0.6,0.5}	21.3999	21.5226	0.80373
Blackman / Dodgson / {3,1}	21.5387	21.4664	0.80121
Blackman / HPL-2007 / {3,3,0.6,0.5}	21.5295	21.4701	0.80042
Blackman / HPL-2007 / {3,7,0.6,0.5}	21.5295	21.4701	0.80042
Blackman / HPL-2007 / {3,11,0.6,0.5}	21.5295	21.4701	0.80042
Lanczos / Welch / {4,7}	21.9169	21.3152	0.79194
Lanczos / PoC window / {4,7,1}	21.9146	21.3162	0.79191
Lanczos / Hanning / {4,11}	21.9271	21.3112	0.79178
Lanczos / Welch / {4,5}	21.9112	21.3175	0.79168
Lanczos / PoC window / {4,11,3}	21.9253	21.3119	0.79161
Lanczos / PoC window / {4,11,1}	21.9488	21.3026	0.79159
Lanczos / Blackman / {4,11}	21.9266	21.3114	0.79153
Lanczos / Welch / {4,11}	21.9556	21.2999	0.79151
Lanczos / Kaiser / {4,11}	21.9289	21.3105	0.79143
Lanczos / PoC window / {4,5,1}	21.9183	21.3147	0.79141
Lanczos / Hanning / {4,7}	21.9293	21.3103	0.7912
Lanczos / Dolph-Chebyshev / {4,11}	21.9347	21.3082	0.79118
Lanczos / Nutall / {4,11}	21.9365	21.3075	0.79112
Lanczos / B-spline window / {4,11}	21.9425	21.3051	0.79101
Lanczos / Hamming / {4,11}	21.9746	21.2924	0.79079
Lanczos / Blackman-Harris / {4,11}	21.9514	21.3016	0.79079
Lanczos / B-spline / {4,7,7}	27.5211	19.3375	0.78994
Lanczos / PoC window / {4,7,3}	21.9795	21.2904	0.78981
Lanczos / Hamming / {4,7}	21.9962	21.2838	0.7898
Lanczos / B-spline / {4,9,9}	42.347	15.5944	0.78955
Lanczos / Blackman / {4,7}	21.9916	21.2857	0.78947
Lanczos / Hanning / {4,5}	22.0056	21.2801	0.78902
Lanczos / Kaiser / {4,7}	22.0117	21.2777	0.78895
Lanczos / Welch / {4,3}	22.0183	21.2751	0.78865
Lanczos / Flat top / {4,11}	22.0255	21.2723	0.78859
Lanczos / Dolph-Chebyshev / {4,7}	22.0551	21.2606	0.78783
Lanczos / B-spline / {4,5,5}	23.2074	20.8183	0.78771
Lanczos / B-spline window / {4,7}	22.0628	21.2576	0.78768
Lanczos / Nutall / {4,7}	22.0657	21.2564	0.78756
Lanczos / PoC window / {4,3,1}	22.0615	21.2581	0.78748
Lanczos / Hamming / {4,5}	22.0882	21.2476	0.78729
Lanczos / Blackman-Harris / {4,7}	22.0881	21.2476	0.78707
Lanczos / B-spline / {4,11,11}	86.8343	9.35697	0.78644
Lanczos / PoC window / {4,5,3}	22.1572	21.2205	0.78529
Lanczos / Blackman / {4,5}	22.1876	21.2086	0.78452
Lanczos / Kaiser / {4,5}	22.2404	21.1879	0.78324
Lanczos / Appledorn / {4,5,11}	22.246	21.1858	0.78308
Lanczos / Appledorn / {4,5,7}	22.246	21.1858	0.78308
Lanczos / Appledorn / {4,5,5}	22.2472	21.1853	0.78305
Lanczos / B-spline window / {4,5}	22.2997	21.1648	0.78177
Lanczos / Dolph-Chebyshev / {4,5}	22.3513	21.1447	0.78057
Lanczos / Nutall / {4,5}	22.3778	21.1344	0.77993
Lanczos / Blackman-Harris / {4,5}	22.4078	21.1228	0.77927
Hanning / Flat top / {3,3}	22.7923	20.975	0.77897
Lanczos / Flat top / {4,7}	22.4365	21.1117	0.77857
Lanczos / Hanning / {4,3}	22.4491	21.1068	0.77811
Lanczos / Appledorn / {4,3,7}	22.4746	21.097	0.77758
Lanczos / Appledorn / {4,3,11}	22.4746	21.097	0.77758
Lanczos / Appledorn / {4,3,5}	22.4745	21.097	0.77758
Gaussian window / NN / {1,1}	24.3204	20.4114	0.7774
Lanczos / B-spline / {4,3,3}	22.5983	21.0493	0.77729
Hamming / Flat top / {3,3}	22.861	20.9489	0.77715
Lanczos / Hamming / {4,3}	22.5441	21.0702	0.77604
Gaussian window / Flat top / {1,3}	22.9464	20.9165	0.77474
Bilinear / Welch / {1,11}	22.6049	21.0467	0.77316
Bilinear / PoC window / {1,11,1}	22.6068	21.046	0.77309
Bilinear / Welch / {1,7}	22.6205	21.0407	0.77265
Bilinear / Hanning / {1,11}	22.6237	21.0395	0.7726
Bilinear / PoC window / {1,7,1}	22.6303	21.037	0.7724
Bilinear / PoC window / {1,11,3}	22.6501	21.0294	0.77192
Hanning / Gaussian window / {3,1}	24.6433	20.2968	0.77182
Bilinear / Blackman / {1,11}	22.6572	21.0267	0.77175
Bilinear / Hamming / {1,11}	22.6645	21.0239	0.77167
Bilinear / Kaiser / {1,11}	22.6671	21.0229	0.7715
Bilinear / Welch / {1,5}	22.6687	21.0223	0.77143
Bilinear / Dolph-Chebyshev / {1,11}	22.6883	21.0148	0.77097
Bilinear / PoC window / {1,5,1}	22.6908	21.0138	0.77089
Bilinear / Nutall / {1,11}	22.6934	21.0128	0.77084
Bilinear / B-spline window / {1,11}	22.6953	21.0121	0.7708
Bilinear / Hanning / {1,7}	22.698	21.0111	0.77073
Hamming / Gaussian window / {3,1}	24.6481	20.2951	0.77062
Bilinear / Blackman-Harris / {1,11}	22.7072	21.0075	0.77052
Bilinear / B-spline / {1,9,9}	36.757	16.824	0.77
German / Flat top / {1,3}	23.1352	20.8453	0.76951
Bilinear / B-spline / {1,7,7}	26.3129	19.7274	0.76942
Bilinear / Hamming / {1,7}	22.7547	20.9894	0.76942
Bilinear / PoC window / {1,7,3}	22.7849	20.9779	0.76862
Hanning / NN / {3,1}	25.0393	20.1583	0.76858
Bilinear / Blackman / {1,7}	22.8042	20.9705	0.76815
Bilinear / B-spline / {1,11,11}	67.8903	11.4947	0.76798
Hamming / NN / {3,1}	25.0362	20.1594	0.76744
Bilinear / Kaiser / {1,7}	22.8337	20.9593	0.76743
German / Gaussian window / {1,1}	24.6043	20.3106	0.76727
Bilinear / Hanning / {1,5}	22.8414	20.9564	0.76727
Bilinear / Flat top / {1,11}	22.8566	20.9506	0.7669
Blackman / Gaussian window / {3,1}	24.5448	20.3316	0.76651
Blackman / Flat top / {3,3}	23.2423	20.8052	0.76642
Bilinear / Welch / {1,3}	22.8838	20.9402	0.76639
Lanczos / German / {4,1}	22.9473	20.9162	0.76633
Lanczos / German / {4,1}	22.9473	20.9162	0.76633
Bilinear / B-spline / {1,5,5}	23.5341	20.6969	0.76606
Bilinear / Dolph-Chebyshev / {1,7}	22.8959	20.9356	0.76593
Bilinear / B-spline window / {1,7}	22.9008	20.9338	0.76581
Bilinear / Hamming / {1,5}	22.9099	20.9303	0.76566
Bilinear / Nutall / {1,7}	22.9105	20.9301	0.76558
Bilinear / Blackman-Harris / {1,7}	22.931	20.9223	0.76509
Bilinear / PoC window / {1,3,1}	22.9457	20.9168	0.76486
German / NN / {1,1}	24.9442	20.1914	0.76468
Blackman / NN / {3,1}	24.8613	20.2203	0.76421
Lanczos / PoC window / {4,3,3}	23.0518	20.8767	0.76399
Bilinear / PoC window / {1,5,3}	23.0327	20.8839	0.76267
Lanczos / Blackman / {4,3}	23.1375	20.8445	0.76199
Bilinear / Blackman / {1,5}	23.0703	20.8697	0.76174
Bilinear / Kaiser / {1,5}	23.1324	20.8464	0.76023
Bilinear / Appledorn / {1,5,11}	23.1366	20.8448	0.76013
Bilinear / Appledorn / {1,5,7}	23.1366	20.8448	0.76013
Bilinear / Appledorn / {1,5,5}	23.1378	20.8444	0.76011
Lanczos / Flat top / {4,5}	23.2367	20.8073	0.75965
Bilinear / B-spline window / {1,5}	23.2081	20.818	0.7584
Lanczos / Kaiser / {4,3}	23.3035	20.7824	0.75811
Bilinear / Dolph-Chebyshev / {1,5}	23.2608	20.7983	0.75712
Bilinear / Nutall / {1,5}	23.2909	20.7871	0.75639
Bilinear / Blackman-Harris / {1,5}	23.3178	20.7771	0.75573
Hanning / Lanczos / {3,3}	24.197	20.4556	0.75512
Bilinear / Flat top / {1,7}	23.3604	20.7612	0.75478
Bilinear / B-spline / {1,3,3}	23.4013	20.746	0.75404
Bilinear / Hanning / {1,3}	23.3982	20.7471	0.75393
Bilinear / Appledorn / {1,3,7}	23.3969	20.7476	0.75384
Bilinear / Appledorn / {1,3,11}	23.3969	20.7476	0.75384
Bilinear / Appledorn / {1,3,5}	23.3968	20.7477	0.75384
Hamming / Lanczos / {3,3}	24.2634	20.4318	0.75323
Lanczos / B-spline window / {4,3}	23.5427	20.6937	0.75254
Hanning / Bilinear / {3,1}	23.4935	20.7119	0.75238
Bilinear / Hamming / {1,3}	23.4696	20.7207	0.75208
Lanczos / Dolph-Chebyshev / {4,3}	23.6101	20.6688	0.75098
Hamming / Bilinear / {3,1}	23.5756	20.6815	0.75034
Lanczos / Nutall / {4,3}	23.6772	20.6442	0.74943
Lanczos / Blackman-Harris / {4,3}	23.7159	20.63	0.74855
German / Lanczos / {1,3}	24.4656	20.3597	0.74638
Lanczos / Dodgson / {4,1}	23.897	20.5639	0.74501
Hanning / O-MOMS / {3,5,5}	27.0903	19.4745	0.74418
Blackman / Lanczos / {3,3}	24.5389	20.3337	0.74373
Hamming / O-MOMS / {3,5,5}	27.0381	19.4913	0.74363
Hanning / O-MOMS / {3,4,4}	27.0872	19.4755	0.74276
Lanczos / HPL-2007 / {4,3,0.6,0.5}	23.9502	20.5446	0.74269
Lanczos / HPL-2007 / {4,7,0.6,0.5}	23.9502	20.5446	0.74269
Lanczos / HPL-2007 / {4,11,0.6,0.5}	23.9502	20.5446	0.74269
Hamming / O-MOMS / {3,4,4}	27.0361	19.4919	0.74217
Hanning / Lanczos / {3,5}	24.6161	20.3064	0.74211
Bilinear / German / {1,1}	23.8914	20.566	0.7417
Bilinear / German / {1,1}	23.8914	20.566	0.7417
Hanning / O-MOMS / {3,3,3}	27.0957	19.4728	0.74123
German / Bilinear / {1,1}	23.956	20.5425	0.74066
Hamming / O-MOMS / {3,3,3}	27.0454	19.4889	0.7406
Hamming / Lanczos / {3,5}	24.7037	20.2755	0.73995
Bilinear / PoC window / {1,3,3}	24.0103	20.5229	0.73884
Gaussian window / Bilinear / {1,1}	24.1289	20.48	0.73762
Bilinear / Blackman / {1,3}	24.096	20.4919	0.7367
Blackman / O-MOMS / {3,5,5}	27.0097	19.5004	0.73651
Blackman / Bilinear / {3,1}	24.1309	20.4793	0.73616
Hanning / Lanczos / {3,7}	24.847	20.2253	0.73552
Blackman / O-MOMS / {3,4,4}	27.0184	19.4976	0.73498
Lanczos / NN / {4,1}	25.3341	20.0567	0.73445
Bilinear / Flat top / {1,5}	24.2008	20.4542	0.73419
Lanczos / Gaussian window / {4,1}	25.2363	20.0903	0.73377
Blackman / O-MOMS / {3,3,3}	27.0375	19.4915	0.73334
Hamming / Lanczos / {3,7}	24.9447	20.1912	0.73323
German / Lanczos / {1,5}	24.9286	20.1969	0.7326
Bilinear / Kaiser / {1,3}	24.2618	20.4323	0.7326
German / O-MOMS / {1,5,5}	20.3446	22.4574	0.73139
German / O-MOMS / {1,5,5}	20.3446	22.4574	0.73139
Quadratic B / Welch / {1,11}	24.2989	20.4191	0.73128
Quadratic B / PoC window / {1,11,1}	24.3021	20.4179	0.73119
Quadratic B / Welch / {1,7}	24.3214	20.411	0.73063
Quadratic B / Hanning / {1,11}	24.3235	20.4103	0.73059
Quadratic B / PoC window / {1,7,1}	24.3316	20.4074	0.73036
German / O-MOMS / {1,4,4}	20.3518	22.454	0.73012
German / O-MOMS / {1,4,4}	20.3518	22.454	0.73012
Quadratic B / PoC window / {1,11,3}	24.3512	20.4004	0.72986
Quadratic B / Blackman / {1,11}	24.3581	20.3979	0.72967
Blackman / Lanczos / {3,5}	25.0214	20.1646	0.7296
Quadratic B / Hamming / {1,11}	24.3647	20.3956	0.72959
Quadratic B / Kaiser / {1,11}	24.368	20.3944	0.72941
Quadratic B / Welch / {1,5}	24.3686	20.3942	0.72938
Hanning / Lanczos / {3,11}	25.0872	20.1418	0.72898
Quadratic B / Dolph-Chebyshev / {1,11}	24.3886	20.3871	0.72887
Quadratic B / PoC window / {1,5,1}	24.3892	20.3869	0.72884
Quadratic B / Nutall / {1,11}	24.3935	20.3853	0.72874
German / O-MOMS / {1,3,3}	20.3662	22.4476	0.72874
German / O-MOMS / {1,3,3}	20.3662	22.4476	0.72874
Quadratic B / B-spline window / {1,11}	24.3959	20.3845	0.72868
Quadratic B / Hanning / {1,7}	24.3971	20.384	0.72864
Gaussian window / O-MOMS / {1,5,5}	27.4068	19.3736	0.72852
Quadratic B / Blackman-Harris / {1,11}	24.4077	20.3803	0.72839
Quadratic B / B-spline / {1,9,9}	34.6246	17.3431	0.72817
Gaussian window / O-MOMS / {1,4,4}	27.3597	19.3886	0.72793
Quadratic B / B-spline / {1,7,7}	26.8687	19.5459	0.72737
Quadratic B / Hamming / {1,7}	24.4561	20.3631	0.7272
Gaussian window / O-MOMS / {1,3,3}	27.3345	19.3966	0.72706
Bilinear / B-spline window / {1,3}	24.5011	20.3471	0.72669
Quadratic B / B-spline / {1,11,11}	58.8752	12.7322	0.72662
Hamming / Lanczos / {3,11}	25.194	20.1049	0.72657
Quadratic B / PoC window / {1,7,3}	24.4787	20.355	0.72653
Quadratic B / Blackman / {1,7}	24.4967	20.3487	0.72605
German / Lanczos / {1,7}	25.1769	20.1107	0.72567
Quadratic B / Kaiser / {1,7}	24.524	20.339	0.72534
Quadratic B / Hanning / {1,5}	24.5266	20.338	0.72528
Bilinear / Dolph-Chebyshev / {1,3}	24.5679	20.3234	0.72505
Quadratic B / Flat top / {1,11}	24.5437	20.332	0.72485
Quadratic B / Welch / {1,3}	24.5506	20.3296	0.72477
Quadratic B / B-spline / {1,5,5}	24.9585	20.1864	0.72396
Quadratic B / Dolph-Chebyshev / {1,7}	24.5811	20.3188	0.72386
Quadratic B / B-spline window / {1,7}	24.5879	20.3164	0.72369
Quadratic B / Nutall / {1,7}	24.5944	20.3141	0.72351
Quadratic B / Hamming / {1,5}	24.6006	20.3119	0.72346
Bilinear / Nutall / {1,3}	24.6347	20.2999	0.72341
Quadratic B / PoC window / {1,3,1}	24.6061	20.31	0.72327
Quadratic B / Blackman-Harris / {1,7}	24.6158	20.3065	0.72298
Bilinear / Blackman-Harris / {1,3}	24.6678	20.2882	0.72256
Blackman / Lanczos / {3,7}	25.2771	20.0763	0.72253
Quadratic B / PoC window / {1,5,3}	24.7036	20.2756	0.7207
Quadratic B / Blackman / {1,5}	24.7388	20.2632	0.71975
German / Lanczos / {1,11}	25.4317	20.0233	0.71883
Quadratic B / Kaiser / {1,5}	24.7962	20.2431	0.71826
Quadratic B / Appledorn / {1,5,11}	24.797	20.2428	0.71824
Quadratic B / Appledorn / {1,5,7}	24.797	20.2428	0.71824
Quadratic B / Appledorn / {1,5,5}	24.7982	20.2424	0.71821
Bilinear / Dodgson / {1,1}	24.8681	20.218	0.71805
Bilinear / HPL-2007 / {1,3,0.6,0.5}	24.8907	20.2101	0.71677
Bilinear / HPL-2007 / {1,7,0.6,0.5}	24.8906	20.2101	0.71677
Bilinear / HPL-2007 / {1,11,0.6,0.5}	24.8906	20.2101	0.71677
NN / Hanning / {1,3}	29.8321	18.6371	0.71673
Quadratic B / B-spline window / {1,5}	24.8646	20.2192	0.71646
NN / Appledorn / {1,3,5}	29.8026	18.6457	0.71624
NN / Appledorn / {1,3,7}	29.8025	18.6458	0.71624
NN / Appledorn / {1,3,11}	29.8025	18.6458	0.71624
NN / Flat top / {1,7}	29.86	18.629	0.71602
NN / Hamming / {1,3}	29.7636	18.6571	0.71589
NN / Nutall / {1,5}	29.9202	18.6115	0.71574
NN / Dolph-Chebyshev / {1,5}	29.9505	18.6027	0.71564
NN / B-spline / {1,3,3}	30.2089	18.5281	0.71561
NN / B-spline window / {1,5}	30.0026	18.5876	0.7156
NN / Blackman-Harris / {1,5}	29.8989	18.6177	0.71557
Blackman / Lanczos / {3,11}	25.5381	19.987	0.71557
NN / German / {1,1}	29.4569	18.7471	0.71536
NN / German / {1,1}	29.4569	18.7471	0.71536
NN / Appledorn / {1,5,7}	30.0772	18.5661	0.71522
NN / Appledorn / {1,5,11}	30.0772	18.5661	0.71522
NN / Appledorn / {1,5,5}	30.0762	18.5663	0.71521
Quadratic B / Dolph-Chebyshev / {1,5}	24.9145	20.2018	0.71517
NN / Kaiser / {1,5}	30.0946	18.561	0.71505
NN / PoC window / {1,3,1}	30.3083	18.4996	0.7148
NN / Blackman / {1,5}	30.1725	18.5386	0.71466
Quadratic B / Nutall / {1,5}	24.9421	20.1921	0.71444
NN / PoC window / {1,5,3}	30.2244	18.5236	0.71436
NN / PoC window / {1,3,3}	29.4513	18.7487	0.71432
NN / Welch / {1,3}	30.4183	18.4681	0.71386
Quadratic B / Blackman-Harris / {1,5}	24.9708	20.1822	0.71371
NN / Blackman / {1,3}	29.4135	18.7599	0.7137
NN / Flat top / {1,5}	29.3994	18.764	0.71302
Quadratic B / Flat top / {1,7}	24.999	20.1724	0.71301
NN / Nutall / {1,7}	30.4315	18.4643	0.71267
NN / Blackman-Harris / {1,7}	30.4155	18.4689	0.71255
NN / Kaiser / {1,3}	29.3544	18.7773	0.71252
Quadratic B / Hanning / {1,3}	25.019	20.1654	0.71245
NN / Dolph-Chebyshev / {1,7}	30.4591	18.4565	0.71243
NN / B-spline window / {1,7}	30.4651	18.4548	0.7122
NN / Hanning / {1,5}	30.532	18.4357	0.71219
Hanning / Quadratic B / {3,1}	25.0421	20.1574	0.71212
Quadratic B / Appledorn / {1,3,5}	25.0317	20.161	0.71212
Quadratic B / B-spline / {1,3,3}	25.0055	20.1701	0.71212
Quadratic B / Appledorn / {1,3,7}	25.0318	20.161	0.71211
Quadratic B / Appledorn / {1,3,11}	25.0318	20.161	0.71211
NN / Flat top / {1,11}	30.5321	18.4357	0.71187
NN / B-spline / {1,5,5}	32.6758	17.8463	0.71166
Lanczos / Flat top / {4,3}	25.3619	20.0472	0.71148
NN / Hamming / {1,5}	30.5029	18.444	0.71135
NN / Kaiser / {1,7}	30.587	18.4201	0.7113
NN / Blackman / {1,7}	30.6528	18.4014	0.7107
NN / B-spline window / {1,3}	29.3014	18.793	0.71047
NN / PoC window / {1,7,3}	30.6994	18.3882	0.71025
Quadratic B / Hamming / {1,3}	25.1061	20.1352	0.7102
NN / Dolph-Chebyshev / {1,3}	29.2911	18.7961	0.70983
Hamming / Quadratic B / {3,1}	25.1359	20.1249	0.70974
NN / Nutall / {1,3}	29.2846	18.798	0.70917
NN / Blackman-Harris / {1,3}	29.2601	18.8053	0.70889
NN / PoC window / {1,5,1}	30.9379	18.321	0.70799
NN / Hanning / {1,7}	30.9463	18.3186	0.70775
NN / B-spline / {1,7,7}	40.0881	16.0705	0.7077
NN / HPL-2007 / {1,7,0.6,0.5}	29.1629	18.8342	0.70741
NN / HPL-2007 / {1,11,0.6,0.5}	29.1629	18.8342	0.70741
NN / HPL-2007 / {1,3,0.6,0.5}	29.1628	18.8342	0.70741
NN / Hamming / {1,7}	30.9291	18.3235	0.70702
NN / Welch / {1,5}	31.0298	18.2952	0.70692
NN / Nutall / {1,11}	31.0069	18.3016	0.70688
NN / Blackman-Harris / {1,11}	30.9963	18.3046	0.7068
NN / Dolph-Chebyshev / {1,11}	31.028	18.2957	0.70663
NN / B-spline window / {1,11}	31.0277	18.2958	0.70652
NN / Kaiser / {1,11}	31.1245	18.2688	0.70551
NN / Blackman / {1,11}	31.1727	18.2553	0.70494
NN / Dodgson / {1,1}	29.4571	18.747	0.70474
NN / PoC window / {1,11,3}	31.2081	18.2455	0.70452
Bilinear / NN / {1,1}	26.3124	19.7276	0.70417
NN / PoC window / {1,7,1}	31.2748	18.2269	0.70385
Bilinear / Gaussian window / {1,1}	26.2285	19.7553	0.70346
NN / B-spline / {1,9,9}	65.6362	11.7879	0.70338
NN / Welch / {1,7}	31.3485	18.2065	0.70292
NN / Hanning / {1,11}	31.3837	18.1967	0.70235
NN / Hamming / {1,11}	31.3749	18.1992	0.7018
Quadratic B / German / {1,1}	25.4874	20.0043	0.70009
Quadratic B / German / {1,1}	25.4874	20.0043	0.70009
German / Quadratic B / {1,1}	25.4951	20.0017	0.70004
NN / PoC window / {1,11,1}	31.6168	18.1324	0.69926
NN / Welch / {1,11}	31.6686	18.1182	0.69855
NN / B-spline / {1,11,11}	166.676	3.69333	0.69728
Quadratic B / PoC window / {1,3,3}	25.6018	19.9654	0.69711
Blackman / Quadratic B / {3,1}	25.6759	19.9403	0.69515
Quadratic B / Blackman / {1,3}	25.6863	19.9368	0.69487
Lanczos / Lanczos / {4,3}	26.2955	19.7332	0.69354
Quadratic B / Flat top / {1,5}	25.7715	19.908	0.69265
Lanczos / O-MOMS / {4,5,5}	27.7906	19.2528	0.69172
Quadratic B / Kaiser / {1,3}	25.8428	19.884	0.69074
Lanczos / O-MOMS / {4,4,4}	27.8099	19.2468	0.69015
Lanczos / O-MOMS / {4,3,3}	27.8387	19.2378	0.68846
Quadratic B / B-spline window / {1,3}	26.0671	19.8089	0.68482
NN / Flat top / {1,3}	29.8525	18.6312	0.68469
Bilinear / Flat top / {1,3}	26.2964	19.7329	0.68363
Quadratic B / Dolph-Chebyshev / {1,3}	26.1299	19.788	0.68317
Quadratic B / Nutall / {1,3}	26.1922	19.7674	0.68154
Quadratic B / Blackman-Harris / {1,3}	26.2297	19.7549	0.68055
Bilinear / O-MOMS / {1,5,5}	27.987	19.1917	0.67981
Bilinear / O-MOMS / {1,4,4}	28.0383	19.1758	0.6777
NN / Bilinear / {1,1}	28.7681	18.9526	0.67741
Lanczos / Lanczos / {4,5}	26.9176	19.5301	0.67644
Quadratic B / Dodgson / {1,1}	26.4195	19.6923	0.67586
Bilinear / O-MOMS / {1,3,3}	28.0922	19.1591	0.67558
Quadratic B / HPL-2007 / {1,3,0.6,0.5}	26.4313	19.6884	0.67498
Quadratic B / HPL-2007 / {1,7,0.6,0.5}	26.4312	19.6885	0.67498
Quadratic B / HPL-2007 / {1,11,0.6,0.5}	26.4312	19.6885	0.67498
Lanczos / Bilinear / {4,1}	26.6594	19.6138	0.67049
Lanczos / Lanczos / {4,7}	27.2292	19.4301	0.66811
Quadratic B / NN / {1,1}	27.502	19.3435	0.66612
Quadratic B / Gaussian window / {1,1}	27.4604	19.3567	0.66484
Bilinear / Lanczos / {1,3}	27.2214	19.4326	0.66456
NN / Lanczos / {1,3}	30.9467	18.3185	0.66417
Lanczos / Lanczos / {4,11}	27.5366	19.3326	0.66003
NN / Lanczos / {1,5}	30.7473	18.3747	0.65763
NN / Lanczos / {1,7}	30.7079	18.3858	0.65383
NN / Gaussian window / {1,1}	34.2492	17.4378	0.65027
NN / Lanczos / {1,11}	30.7008	18.3878	0.64984
NN / Quadratic B / {1,1}	29.2186	18.8176	0.64936
Bilinear / Bilinear / {1,1}	27.3585	19.389	0.64896
Bilinear / Lanczos / {1,5}	27.7981	19.2505	0.64785
Quadratic B / O-MOMS / {1,5,5}	28.8328	18.9331	0.64782
Quadratic B / O-MOMS / {1,4,4}	28.8892	18.9161	0.64566
NN / NN / {1,1}	34.9642	17.2583	0.64386
Quadratic B / O-MOMS / {1,3,3}	28.9461	18.899	0.64354
Quadratic B / Flat top / {1,3}	27.7095	19.2782	0.6427
Bilinear / Lanczos / {1,7}	28.0871	19.1607	0.6397
Bilinear / Lanczos / {1,11}	28.3728	19.0727	0.63179
Lanczos / Quadratic B / {4,1}	28.1234	19.1494	0.62804
Quadratic B / Lanczos / {1,3}	28.5274	19.0255	0.62471
Bilinear / Quadratic B / {1,1}	28.6615	18.9848	0.61065
Quadratic B / Bilinear / {1,1}	28.6776	18.98	0.61033
Quadratic B / Lanczos / {1,5}	29.0867	18.8569	0.60802
Quadratic B / Lanczos / {1,7}	29.3664	18.7738	0.59989
Quadratic B / Lanczos / {1,11}	29.6425	18.6925	0.59202
Quadratic B / Quadratic B / {1,1}	29.836	18.636	0.57511
NN / O-MOMS / {1,3,3}	44.1354	15.2351	0.43491
NN / O-MOMS / {1,4,4}	44.3582	15.1913	0.43367
NN / O-MOMS / {1,5,5}	44.6244	15.1394	0.43198
Quadratic B / BC-spline / {1,1}	50.2056	14.1158	0.04836
Bilinear / BC-spline / {1,1}	50.8054	14.0126	0.04072
Lanczos / BC-spline / {4,1}	51.0793	13.9659	0.03671
Keys / MeijeringS / {-0.5,1}	65.1295	11.8552	0.03164
Keys / MeijeringS / {-0.75,1}	65.4613	11.8111	0.03148
Keys / MeijeringQ / {-0.5,1}	66.7908	11.6365	0.0289
Keys / MeijeringQ / {-0.75,1}	67.1774	11.5863	0.02875
Gaussian window / BC-spline / {1,1}	52.5436	13.7204	0.02464
Quadratic B / BC-spline / {1,7}	52.1244	13.79	0.02395
Blackman / BC-spline / {3,1}	52.6288	13.7063	0.02188
NN / MeijeringS / {1,1}	67.4917	11.5458	0.02146
German / MeijeringS / {1,1}	65.11	11.8578	0.02056
Hanning / MeijeringS / {3,1}	65.6158	11.7906	0.02055
Blackman / MeijeringS / {3,1}	64.919	11.8834	0.02051
Hamming / MeijeringS / {3,1}	65.3547	11.8253	0.02045
Gaussian window / MeijeringS / {1,1}	64.677	11.9158	0.02019
German / BC-spline / {1,1}	52.7659	13.6837	0.02015
Keys / Keys / {-0.75,-0.75}	66.5791	11.664	0.01991
Bilinear / MeijeringS / {1,1}	62.2669	12.2457	0.0199
Lanczos / MeijeringS / {4,1}	62.4376	12.2219	0.01988
Keys / Keys / {-0.5,-0.75}	66.1801	11.7163	0.01957
Keys / MeijeringC / {-0.75,1}	66.3032	11.7001	0.01952
Keys / Keys / {-0.75,-0.5}	66.3032	11.7001	0.01952
Quadratic B / MeijeringS / {1,1}	61.4435	12.3613	0.01949
Keys / MeijeringC / {-0.5,1}	65.9144	11.7512	0.01917
Keys / Keys / {-0.5,-0.5}	65.9144	11.7512	0.01917
Quadratic B / BC-spline / {1,6}	52.5564	13.7183	0.01916
Hanning / BC-spline / {3,1}	53.1028	13.6285	0.01721
Keys / BC-spline / {-0.75,2}	61.7168	12.3227	0.01701
Keys / BC-spline / {-0.75,5}	61.6092	12.3379	0.01697
Keys / BC-spline / {-0.75,3}	61.574	12.3429	0.01696
Keys / BC-spline / {-0.75,4}	61.5503	12.3462	0.01695
Keys / BC-spline / {-0.75,6}	61.3491	12.3746	0.01687
Keys / BC-spline / {-0.75,7}	61.002	12.4239	0.01673
Keys / BC-spline / {-0.5,2}	61.4486	12.3606	0.01665
Keys / BC-spline / {-0.5,5}	61.3431	12.3755	0.01661
Keys / BC-spline / {-0.5,3}	61.3086	12.3804	0.0166
Keys / BC-spline / {-0.5,4}	61.2854	12.3837	0.01659
Quadratic B / BC-spline / {1,4}	52.8015	13.6779	0.01655
Keys / BC-spline / {-0.5,6}	61.0882	12.4117	0.01652
Keys / BC-spline / {-0.5,7}	60.7478	12.4602	0.01639
Hamming / BC-spline / {3,1}	53.01	13.6436	0.0163
Quadratic B / BC-spline / {1,3}	52.8301	13.6732	0.01625
Bilinear / BC-spline / {1,7}	52.8705	13.6665	0.01618
Keys / BC-spline / {-0.75,1}	59.5776	12.6291	0.01592
Quadratic B / BC-spline / {1,5}	52.8725	13.6662	0.01581
NN / MeijeringQ / {1,1}	70.309	11.1906	0.0158
Keys / BC-spline / {-0.5,1}	59.3484	12.6626	0.01569
Quadratic B / BC-spline / {1,2}	53.0015	13.645	0.01448
Hanning / MeijeringQ / {3,1}	67.3626	11.5624	0.01319
Hamming / MeijeringQ / {3,1}	67.0781	11.5992	0.01311
German / MeijeringQ / {1,1}	66.7157	11.6462	0.01308
Blackman / MeijeringQ / {3,1}	66.4715	11.6781	0.01294
Lanczos / BC-spline / {4,7}	53.202	13.6122	0.01281
Gaussian window / MeijeringQ / {1,1}	66.2959	11.7011	0.01248
Lanczos / MeijeringQ / {4,1}	63.4209	12.0862	0.0119
Bilinear / MeijeringQ / {1,1}	63.0927	12.1312	0.01173
Bilinear / BC-spline / {1,6}	53.3369	13.5902	0.01144
Quadratic B / MeijeringQ / {1,1}	62.0508	12.2759	0.01113
NN / BC-spline / {1,1}	56.0566	13.1583	0.01103
Bilinear / BC-spline / {1,4}	53.6017	13.5472	0.00888
Bilinear / BC-spline / {1,3}	53.6326	13.5422	0.00858
Lanczos / BC-spline / {4,6}	53.6832	13.534	0.00823
Bilinear / BC-spline / {1,5}	53.6785	13.5348	0.00815
Bilinear / BC-spline / {1,2}	53.818	13.5122	0.00685
Lanczos / BC-spline / {4,4}	53.9568	13.4899	0.00575
Lanczos / BC-spline / {4,3}	53.9888	13.4847	0.00547
Lanczos / BC-spline / {4,5}	54.0361	13.4771	0.00505
Lanczos / BC-spline / {4,2}	54.1804	13.454	0.0038
Gaussian window / BC-spline / {1,7}	55.063	13.3136	0.00093
Blackman / BC-spline / {3,7}	55.1474	13.3003	-0.00214
NN / BC-spline / {1,7}	58.8807	12.7313	-0.00322
Gaussian window / BC-spline / {1,6}	55.6389	13.2232	-0.00344
German / BC-spline / {1,7}	55.3146	13.274	-0.00375
NN / BC-spline / {1,6}	59.5418	12.6344	-0.00566
Gaussian window / BC-spline / {1,4}	55.967	13.1722	-0.00577
Gaussian window / BC-spline / {1,3}	56.0055	13.1662	-0.00603
Gaussian window / BC-spline / {1,5}	56.0624	13.1574	-0.00642
Hanning / BC-spline / {3,7}	55.7346	13.2083	-0.00643
Blackman / BC-spline / {3,6}	55.7213	13.2104	-0.00653
NN / BC-spline / {1,4}	59.921	12.5792	-0.00692
Hamming / BC-spline / {3,7}	55.6051	13.2285	-0.00705
NN / BC-spline / {1,3}	59.9656	12.5728	-0.00706
NN / BC-spline / {1,5}	60.0316	12.5632	-0.00727
Gaussian window / BC-spline / {1,2}	56.2357	13.1306	-0.00759
NN / BC-spline / {1,2}	60.233	12.5341	-0.00789
German / BC-spline / {1,6}	55.8956	13.1833	-0.0081
Blackman / BC-spline / {3,4}	56.048	13.1596	-0.00887
Blackman / BC-spline / {3,3}	56.0862	13.1537	-0.00914
Blackman / BC-spline / {3,5}	56.1429	13.1449	-0.00953
German / BC-spline / {1,4}	56.2264	13.132	-0.01041
German / BC-spline / {1,3}	56.2651	13.126	-0.01068
Hanning / BC-spline / {3,6}	56.3354	13.1152	-0.01069
Blackman / BC-spline / {3,2}	56.3154	13.1183	-0.0107
German / BC-spline / {1,5}	56.3224	13.1172	-0.01106
Hamming / BC-spline / {3,6}	56.1975	13.1365	-0.01125
German / BC-spline / {1,2}	56.4971	13.0903	-0.01222
Hanning / BC-spline / {3,4}	56.6777	13.0626	-0.01294
Hanning / BC-spline / {3,3}	56.7178	13.0564	-0.0132
Hamming / BC-spline / {3,4}	56.5349	13.0845	-0.01347
Hanning / BC-spline / {3,5}	56.7771	13.0473	-0.01358
Hamming / BC-spline / {3,3}	56.5744	13.0784	-0.01373
Hamming / BC-spline / {3,5}	56.6329	13.0694	-0.0141
Hanning / BC-spline / {3,2}	56.9579	13.0197	-0.0147
Hamming / BC-spline / {3,2}	56.8112	13.0421	-0.0152
Quadratic B / MeijeringC / {1,1}	57.6086	12.9211	-0.0165
Quadratic B / Keys / {1,-0.5}	57.6086	12.9211	-0.0165
Quadratic B / Keys / {1,-0.75}	57.9425	12.8709	-0.01945
Keys / Quadratic B / {-0.5,1}	57.2384	12.9771	-0.01975
Keys / Lanczos / {-0.5,11}	58.2059	12.8315	-0.01979
NN / MeijeringC / {1,1}	68.2635	11.447	-0.02029
NN / Keys / {1,-0.5}	68.2635	11.447	-0.02029
Keys / Lanczos / {-0.5,7}	58.5808	12.7757	-0.02056
Keys / O-MOMS / {-0.5,5,5}	64.1756	11.9834	-0.02123
Keys / O-MOMS / {-0.5,4,4}	64.0577	11.9994	-0.02133
Keys / Lanczos / {-0.5,5}	58.9743	12.7175	-0.02136
Keys / O-MOMS / {-0.5,3,3}	63.9537	12.0135	-0.02141
Keys / O-MOMS / {-0.75,5,5}	64.7208	11.9099	-0.02188
Lanczos / MeijeringC / {4,1}	59.3911	12.6564	-0.02191
Lanczos / Keys / {4,-0.5}	59.3911	12.6564	-0.02191
Bilinear / MeijeringC / {1,1}	58.8691	12.7331	-0.02196
Bilinear / Keys / {1,-0.5}	58.8691	12.7331	-0.02196
NN / Keys / {1,-0.75}	68.7179	11.3894	-0.02201
Keys / O-MOMS / {-0.75,4,4}	64.6025	11.9258	-0.02202
Keys / O-MOMS / {-0.75,3,3}	64.4978	11.9399	-0.02212
Keys / Quadratic B / {-0.75,1}	57.6449	12.9156	-0.02229
Keys / Lanczos / {-0.75,11}	58.6274	12.7688	-0.02234
Keys / Lanczos / {-0.75,7}	59.0153	12.7115	-0.0231
Keys / Lanczos / {-0.5,3}	59.7963	12.5973	-0.02322
Keys / Lanczos / {-0.75,5}	59.4225	12.6518	-0.02389
Keys / Bilinear / {-0.5,1}	58.3284	12.8132	-0.02435
Bilinear / Keys / {1,-0.75}	59.2311	12.6798	-0.02494
Lanczos / Keys / {4,-0.75}	59.7549	12.6033	-0.02509
Keys / Lanczos / {-0.75,3}	60.2726	12.5284	-0.02568
Keys / Flat top / {-0.5,3}	59.9087	12.581	-0.02597
Keys / Bilinear / {-0.75,1}	58.7685	12.7479	-0.02682
Keys / NN / {-0.5,1}	63.157	12.1224	-0.02717
Keys / Gaussian window / {-0.5,1}	62.774	12.1752	-0.02718
Keys / Flat top / {-0.75,3}	60.3911	12.5114	-0.02837
Gaussian window / MeijeringC / {1,1}	62.691	12.1867	-0.02874
Gaussian window / Keys / {1,-0.5}	62.691	12.1867	-0.02874
Keys / NN / {-0.75,1}	63.7249	12.0446	-0.02924
Keys / Gaussian window / {-0.75,1}	63.3324	12.0983	-0.02929
Keys / Dodgson / {-0.5,1}	60.8995	12.4385	-0.03085
Keys / HPL-2007 / {-0.5,7,0.6,0.5}	60.8306	12.4484	-0.03159
Keys / HPL-2007 / {-0.5,11,0.6,0.5}	60.8306	12.4484	-0.03159
Keys / HPL-2007 / {-0.5,3,0.6,0.5}	60.8304	12.4484	-0.03159
Gaussian window / Keys / {1,-0.75}	63.1181	12.1277	-0.03171
Keys / Nutall / {-0.5,3}	61.1258	12.4063	-0.03233
Keys / Blackman-Harris / {-0.5,3}	61.0415	12.4183	-0.03237
Keys / Dolph-Chebyshev / {-0.5,3}	61.1915	12.397	-0.03258
Keys / B-spline window / {-0.5,3}	61.2613	12.3871	-0.03281
Blackman / MeijeringC / {3,1}	62.8359	12.1666	-0.03299
Blackman / Keys / {3,-0.5}	62.8359	12.1666	-0.03299
Keys / Dodgson / {-0.75,1}	61.4122	12.3657	-0.03301
Keys / Kaiser / {-0.5,3}	61.5084	12.3521	-0.03368
Keys / HPL-2007 / {-0.75,7,0.6,0.5}	61.3456	12.3751	-0.03373
Keys / HPL-2007 / {-0.75,11,0.6,0.5}	61.3456	12.3751	-0.03373
Keys / HPL-2007 / {-0.75,3,0.6,0.5}	61.3454	12.3752	-0.03373
Keys / Flat top / {-0.5,5}	61.6576	12.3311	-0.03377
German / MeijeringC / {1,1}	63.1334	12.1256	-0.034
German / Keys / {1,-0.5}	63.1334	12.1256	-0.034
Keys / Blackman / {-0.5,3}	61.6912	12.3263	-0.03425
Keys / Nutall / {-0.75,3}	61.6501	12.3321	-0.03441
Keys / Blackman-Harris / {-0.75,3}	61.5622	12.3445	-0.03445
Keys / PoC window / {-0.5,3,3}	61.8104	12.3096	-0.03452
Keys / Dolph-Chebyshev / {-0.75,3}	61.718	12.3226	-0.03464
Keys / B-spline window / {-0.75,3}	61.7902	12.3124	-0.03486
Hanning / MeijeringC / {3,1}	63.8756	12.0241	-0.03524
Hanning / Keys / {3,-0.5}	63.8756	12.0241	-0.03524
Keys / German / {-0.5,1}	61.9168	12.2946	-0.03531
Keys / German / {-0.5,1}	61.9168	12.2946	-0.03531
Hamming / MeijeringC / {3,1}	63.6345	12.0569	-0.03544
Hamming / Keys / {3,-0.5}	63.6345	12.0569	-0.03544
Blackman / Keys / {3,-0.75}	63.2812	12.1053	-0.03564
Keys / Kaiser / {-0.75,3}	62.0456	12.2766	-0.03567
Keys / Flat top / {-0.75,5}	62.2022	12.2547	-0.03575
Keys / Blackman / {-0.75,3}	62.2346	12.2502	-0.03619
Keys / PoC window / {-0.75,3,3}	62.3583	12.2329	-0.03644
Keys / Hanning / {-0.5,3}	62.5258	12.2096	-0.03647
German / Keys / {1,-0.75}	63.5858	12.0636	-0.03658
Keys / Hamming / {-0.5,3}	62.2845	12.2432	-0.03658
Keys / Flat top / {-0.5,7}	62.4316	12.2227	-0.0369
Keys / Blackman-Harris / {-0.5,5}	62.4106	12.2256	-0.03699
Keys / Appledorn / {-0.5,3,5}	62.39	12.2285	-0.03703
Keys / Appledorn / {-0.5,3,7}	62.3898	12.2285	-0.03703
Keys / Appledorn / {-0.5,3,11}	62.3898	12.2285	-0.03703
Keys / Nutall / {-0.5,5}	62.4671	12.2178	-0.03706
Keys / B-spline / {-0.5,3,3}	62.3921	12.2282	-0.03707
Keys / Dolph-Chebyshev / {-0.5,5}	62.4958	12.2138	-0.03715
Keys / German / {-0.75,1}	62.4694	12.2174	-0.03717
Keys / German / {-0.75,1}	62.4694	12.2174	-0.03717
Keys / B-spline window / {-0.5,5}	62.559	12.205	-0.03727
Keys / Kaiser / {-0.5,5}	62.6202	12.1965	-0.03754
Keys / Appledorn / {-0.5,5,5}	62.6192	12.1967	-0.0377
Keys / Blackman / {-0.5,5}	62.6846	12.1876	-0.03771
Keys / Appledorn / {-0.5,5,7}	62.6214	12.1964	-0.03771
Keys / Appledorn / {-0.5,5,11}	62.6214	12.1964	-0.03771
Hanning / Keys / {3,-0.75}	64.3427	11.9608	-0.03773
Keys / PoC window / {-0.5,5,3}	62.7199	12.1827	-0.03784
Hamming / Keys / {3,-0.75}	64.093	11.9946	-0.0379
Keys / Blackman-Harris / {-0.5,7}	62.7929	12.1726	-0.03803
Keys / PoC window / {-0.5,3,1}	62.8887	12.1593	-0.03804
Keys / Nutall / {-0.5,7}	62.8327	12.1671	-0.03809
Keys / B-spline / {-0.5,5,5}	63.0525	12.1368	-0.0381
Keys / B-spline / {-0.5,11,11}	97.224	8.37533	-0.03811
Keys / B-spline window / {-0.5,7}	62.8286	12.1677	-0.03811
Keys / Dolph-Chebyshev / {-0.5,7}	62.8476	12.165	-0.03812
Keys / Hamming / {-0.5,5}	62.7762	12.1749	-0.03812
Keys / Hanning / {-0.75,3}	63.0971	12.1306	-0.0382
Keys / Flat top / {-0.5,11}	62.8918	12.1589	-0.03823
Keys / Kaiser / {-0.5,7}	62.9134	12.1559	-0.03824
Keys / Hamming / {-0.5,11}	63.1448	12.1241	-0.03825
Keys / Hamming / {-0.5,7}	62.9712	12.148	-0.03826
Keys / Welch / {-0.5,3}	62.928	12.1539	-0.03827
Keys / B-spline / {-0.5,9,9}	68.6468	11.3984	-0.03828
Keys / Blackman / {-0.5,7}	62.9477	12.1512	-0.03829
Keys / Hanning / {-0.5,5}	62.9279	12.1539	-0.03829
Keys / Hamming / {-0.75,3}	62.8452	12.1654	-0.03829
Keys / B-spline / {-0.5,7,7}	64.0224	12.0042	-0.0383
Keys / Welch / {-0.5,11}	63.2952	12.1034	-0.03831
Keys / PoC window / {-0.5,11,1}	63.2815	12.1053	-0.03832
Keys / PoC window / {-0.5,7,3}	62.9678	12.1484	-0.03833
Keys / Blackman-Harris / {-0.5,11}	63.0606	12.1356	-0.03835
Keys / B-spline window / {-0.5,11}	63.0838	12.1324	-0.03836
Keys / Hanning / {-0.5,11}	63.2152	12.1144	-0.03837
Keys / Dolph-Chebyshev / {-0.5,11}	63.0937	12.1311	-0.03838
Keys / Nutall / {-0.5,11}	63.086	12.1321	-0.03838
Keys / Welch / {-0.5,7}	63.2104	12.115	-0.03839
Keys / PoC window / {-0.5,11,3}	63.1567	12.1224	-0.03839
Keys / Blackman / {-0.5,11}	63.1452	12.124	-0.03839
Keys / Kaiser / {-0.5,11}	63.1277	12.1264	-0.03839
Keys / PoC window / {-0.5,7,1}	63.1895	12.1179	-0.0384
Keys / Hanning / {-0.5,7}	63.0803	12.1329	-0.03843
Keys / Welch / {-0.5,5}	63.1196	12.1275	-0.03844
Keys / PoC window / {-0.5,5,1}	63.0919	12.1313	-0.03844
Keys / Flat top / {-0.75,7}	62.9974	12.1443	-0.03858
Keys / Blackman-Harris / {-0.75,5}	62.9728	12.1478	-0.03865
Keys / Nutall / {-0.75,5}	63.0315	12.1396	-0.03871
Keys / Appledorn / {-0.75,3,5}	62.955	12.1502	-0.03871
Keys / Appledorn / {-0.75,3,7}	62.9548	12.1502	-0.03871
Keys / Appledorn / {-0.75,3,11}	62.9548	12.1502	-0.03871
Keys / B-spline / {-0.75,3,3}	62.9525	12.1505	-0.03873
Keys / Dolph-Chebyshev / {-0.75,5}	63.0608	12.1356	-0.03879
Keys / B-spline window / {-0.75,5}	63.1257	12.1267	-0.0389
Keys / Kaiser / {-0.75,5}	63.1874	12.1182	-0.03913
Keys / Blackman / {-0.75,5}	63.2528	12.1092	-0.03927
Keys / Appledorn / {-0.75,5,5}	63.1872	12.1182	-0.03928
Keys / Appledorn / {-0.75,5,7}	63.1895	12.1179	-0.03929
Keys / Appledorn / {-0.75,5,11}	63.1895	12.1179	-0.03929
Keys / PoC window / {-0.75,5,3}	63.2889	12.1043	-0.03939
Keys / B-spline / {-0.75,11,11}	96.3664	8.45229	-0.03951
Keys / Blackman-Harris / {-0.75,7}	63.3598	12.0945	-0.03952
Keys / PoC window / {-0.75,3,1}	63.4671	12.0798	-0.03956
Keys / Nutall / {-0.75,7}	63.4011	12.0889	-0.03958
Keys / B-spline / {-0.75,5,5}	63.6158	12.0595	-0.03959
Keys / Hamming / {-0.75,5}	63.3406	12.0972	-0.03959
Keys / B-spline window / {-0.75,7}	63.3958	12.0896	-0.0396
Keys / Dolph-Chebyshev / {-0.75,7}	63.416	12.0868	-0.03961
Keys / Hamming / {-0.75,11}	63.7046	12.0474	-0.03963
Keys / Hamming / {-0.75,7}	63.5338	12.0707	-0.03966
Keys / Welch / {-0.75,11}	63.8552	12.0269	-0.03967
Keys / B-spline / {-0.75,9,9}	69.0285	11.3502	-0.03968
Keys / PoC window / {-0.75,11,1}	63.842	12.0287	-0.03968
Keys / Kaiser / {-0.75,7}	63.4817	12.0778	-0.0397
Keys / Flat top / {-0.75,11}	63.4609	12.0807	-0.0397
Keys / B-spline / {-0.75,7,7}	64.5631	11.9311	-0.03973
Keys / Hanning / {-0.75,11}	63.778	12.0374	-0.03974
Keys / Blackman / {-0.75,7}	63.5159	12.0732	-0.03974
Keys / Welch / {-0.75,3}	63.5063	12.0745	-0.03974
Keys / Blackman-Harris / {-0.75,11}	63.6255	12.0582	-0.03975
Keys / Welch / {-0.75,7}	63.7739	12.038	-0.03976
Keys / B-spline window / {-0.75,11}	63.6488	12.055	-0.03976
Keys / Hanning / {-0.75,5}	63.4988	12.0755	-0.03976
Keys / PoC window / {-0.75,11,3}	63.7209	12.0452	-0.03977
Keys / Blackman / {-0.75,11}	63.7097	12.0467	-0.03977
Keys / PoC window / {-0.75,7,3}	63.5359	12.0704	-0.03977
Keys / PoC window / {-0.75,7,1}	63.7537	12.0407	-0.03978
Keys / Kaiser / {-0.75,11}	63.6925	12.049	-0.03978
Keys / Dolph-Chebyshev / {-0.75,11}	63.6593	12.0536	-0.03979
Keys / Nutall / {-0.75,11}	63.6518	12.0546	-0.03979
Keys / Hanning / {-0.75,7}	63.6475	12.0552	-0.03983
Keys / Welch / {-0.75,5}	63.6871	12.0498	-0.03984
Keys / PoC window / {-0.75,5,1}	63.6602	12.0534	-0.03985
